# Supplementary material for: Atomic-resolution mapping of transcription factor-DNA interactions by femtosecond laser crosslinking and mass spectrometry
Source: Springer Nature journal article supplement (doi:10.1038/s41467-020-16837-x), 2020-06-15

## Supplementary Data 1

### **Reim et al.: 'Atomic-resolution mapping of transcription factor-DNA interactions by femtosecond laser crosslinking and mass spectrometry'**

**Supplementary Data 1: Annotated MS/MS spectra of all crosslinks from this study.** All annotated peaks are labeled with the corresponding fragment ion together with the observed experimental mass. The following abbreviations were used: A: Deoxyadenosine monophosphate, C: Deoxycytidine monophosphate, G: Deoxyguanosine monophosphate, T: Thymidine monophosphate, X': Nucleobase of either of the Nucleotides (X = A, C, G or T), -A: Neutral loss of NH<sub>3</sub>, -Ca: Neutral loss of isocyanic acid from Carbamyl group, -CO: Neutral loss of Carbon monoxide, +CO: Adduct with Carbon monoxide, -HP: Neutral loss of hydrogen peroxide on trioxidized cysteins, -p: Neutral loss of HPO<sub>3</sub>, -P: Neutral loss of H<sub>3</sub>PO<sub>4</sub>, Ox: Oxidation of methionine, Triox/Tox: Trioxidation of cysteine, -W: Neutral loss of H<sub>2</sub>O, +W: Adduct with H<sub>2</sub>O, Asterisk: Neutral loss of H<sub>2</sub>SO<sub>3</sub> on trioxidized cysteine, Caret: Neutral loss of CH<sub>4</sub>SO of oxidized methionine.



DCP #2  
 $^{22}\text{VLRDNIQGITK}^{\text{Carb}}\text{PAIR}^{36} + [\text{CT-H}_2\text{O}]$   
**Histone H4 (P62805)**

| m(calculated) |          |            | $\Delta m$ [ppm] | experimental |        |
|---------------|----------|------------|------------------|--------------|--------|
| peptide       | DNA      | cross-link |                  | m/z          | charge |
| 1736.0057     | 593.0924 | 2329.0981  | 9.5              | 777.3659     | 3      |

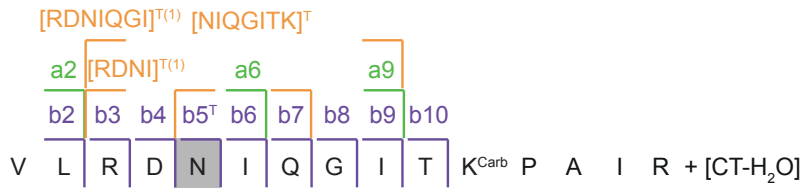

$^{\text{T}}$  observed as thymine crosslink,  $^{(1)}$  Could also be  $[\text{LRDN}]^{\text{T}}/[\text{LRDNIQG}]^{\text{T}}$

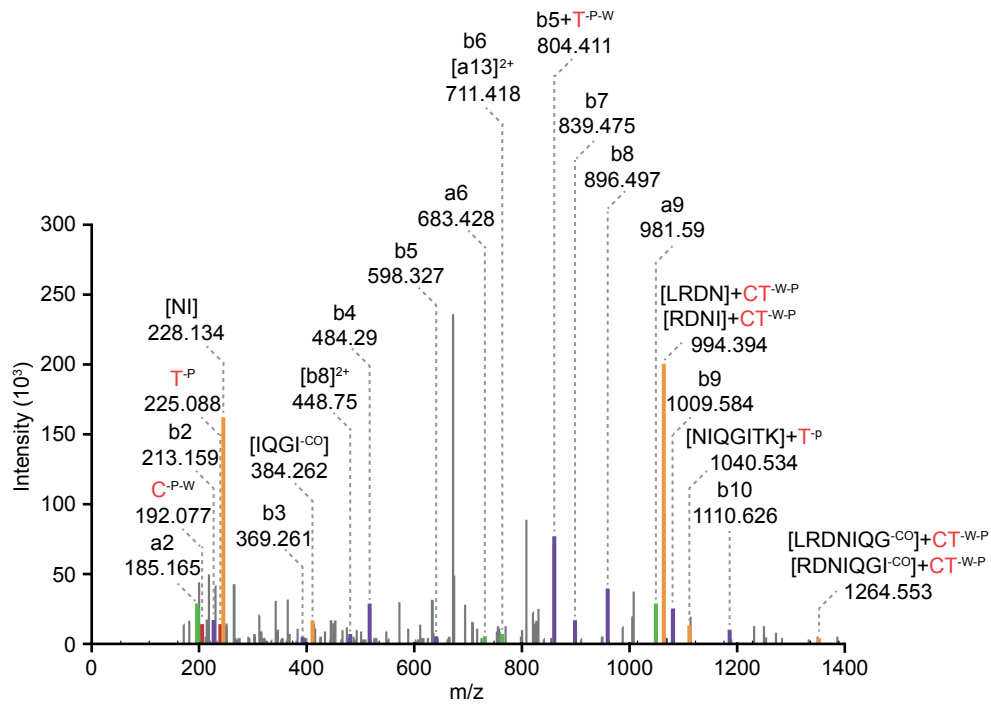

DCP #3  
<sup>29</sup>SAPATGGVK<sup>37</sup> + [C-HPO<sub>3</sub>]  
**Histone H3.1 (P68431)**

| m(calculated) |          |            | Δm [ppm] | experimental |        |
|---------------|----------|------------|----------|--------------|--------|
| peptide       | DNA      | cross-link |          | m/z          | charge |
| 786.4236      | 227.0906 | 1013.5142  | 1.6      | 507.7652     | 2      |

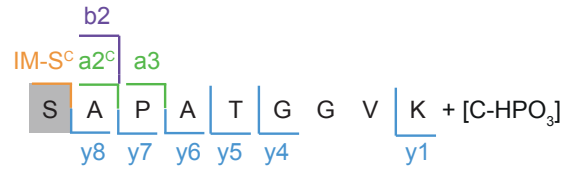

<sup>c</sup> observed as cytosine crosslink

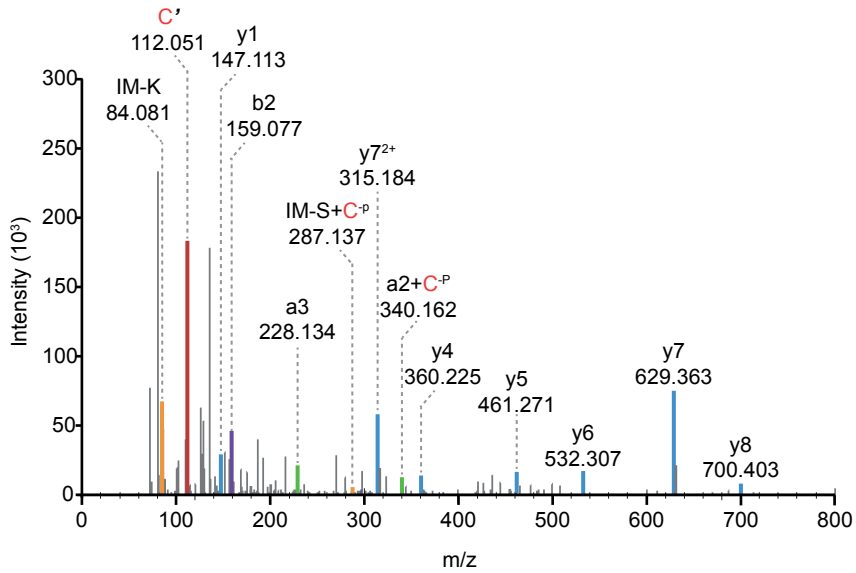

DCP #4  
<sup>74</sup>EIAQDFK<sup>80</sup> + [AT-HPO<sub>3</sub>]  
**Histone H3.1 (P68431)**

| m(calculated) |          |            | $\Delta m$ [ppm] | experimental |        |
|---------------|----------|------------|------------------|--------------|--------|
| peptide       | DNA      | cross-link |                  | m/z          | charge |
| 849.4232      | 555.1479 | 1404.5711  | 6.5              | 703.2883     | 2      |

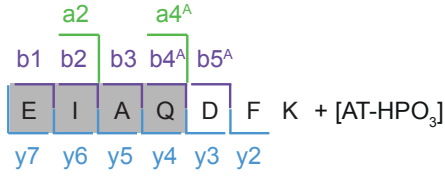

<sup>A</sup> observed as adenine crosslink

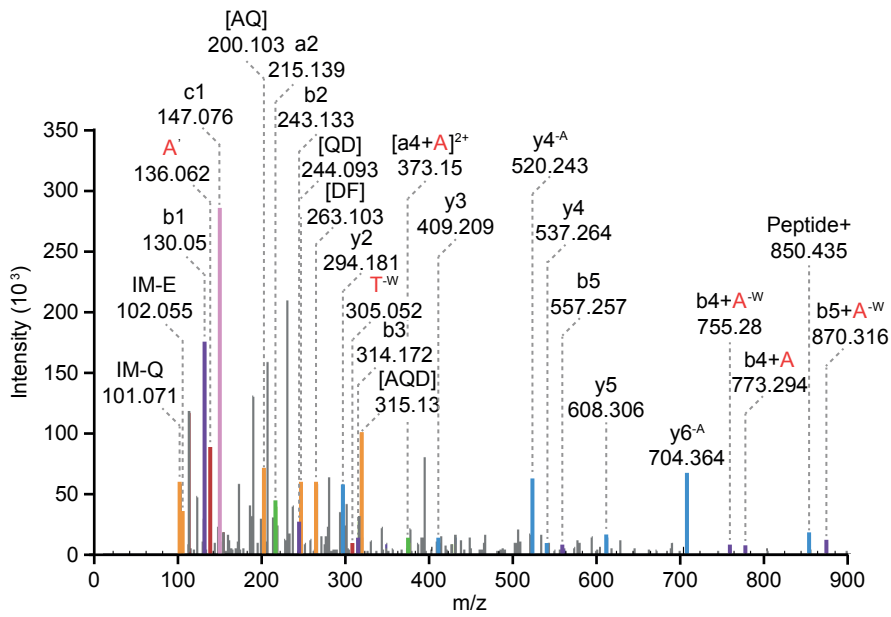

DCP #5  
<sup>118</sup>VTIM<sup>ox</sup>PKDIQLAR<sup>129</sup> + [C-HPO<sub>3</sub>]  
**Histone H3.1 (P68431)**

| m(calculated) |          |            | $\Delta m$ [ppm] | experimental |        |
|---------------|----------|------------|------------------|--------------|--------|
| peptide       | DNA      | cross-link |                  | m/z          | charge |
| 1399.7857     | 227.0906 | 1626.8763  | 6.7              | 543.3030     | 3      |

IM-T<sup>c</sup>

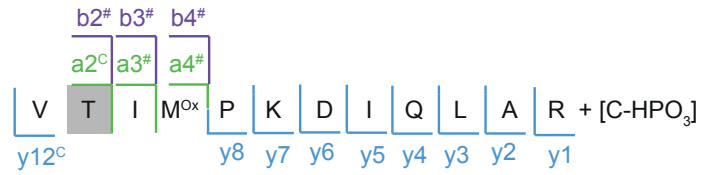

<sup>c</sup> observed as cytosine crosslink

<sup>#</sup> observed with mass shift of 184.095

<sup>^</sup> neutral loss of CH<sub>4</sub>SO on oxidized methionine

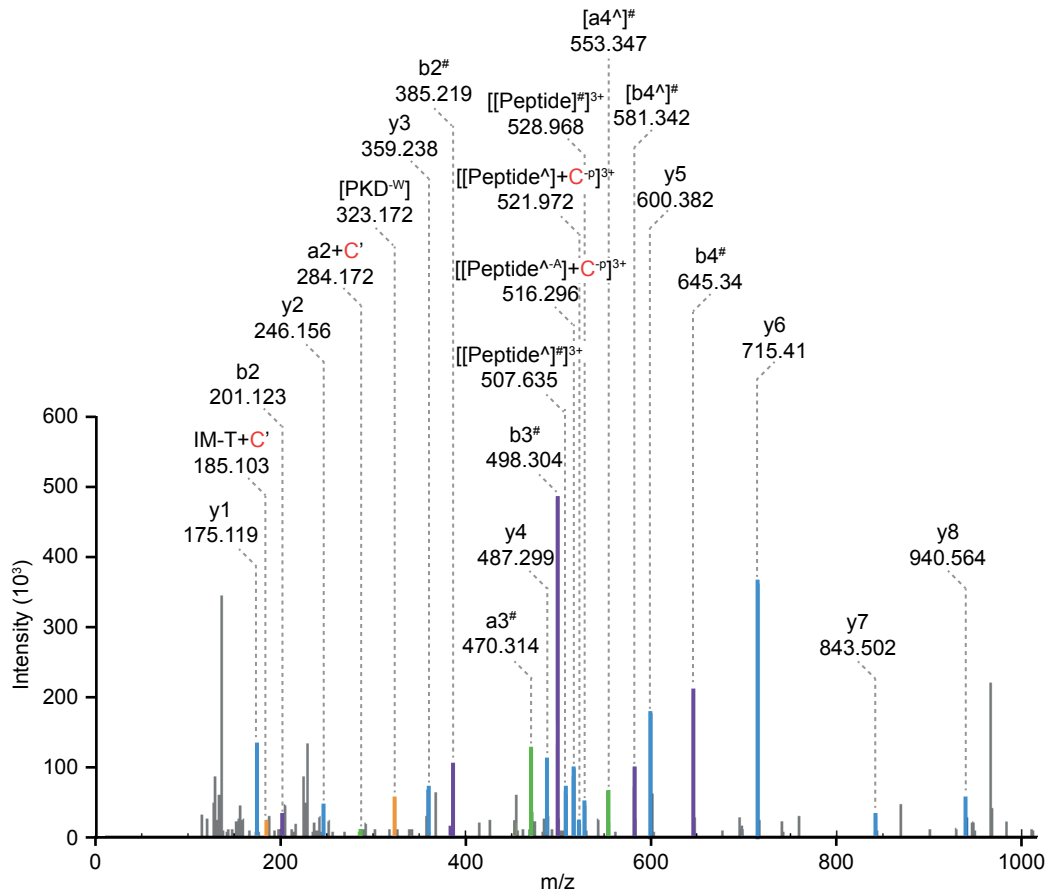

DCP #6  
<sup>45</sup>VLKQVHPDTGISSK<sup>58</sup> + [AAGT+HPO<sub>3</sub>]  
**Histone H2B-1K (O60814)**

| m(calculated) |           |            | $\Delta m$ [ppm] | experimental |        |
|---------------|-----------|------------|------------------|--------------|--------|
| peptide       | DNA       | cross-link |                  | m/z          | charge |
| 1507.8358     | 1357.1907 | 2865.0265  | 4.6              | 1433.5139    | 2      |

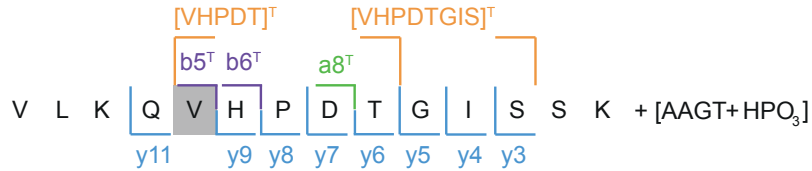

<sup>T</sup> observed as thymine crosslink

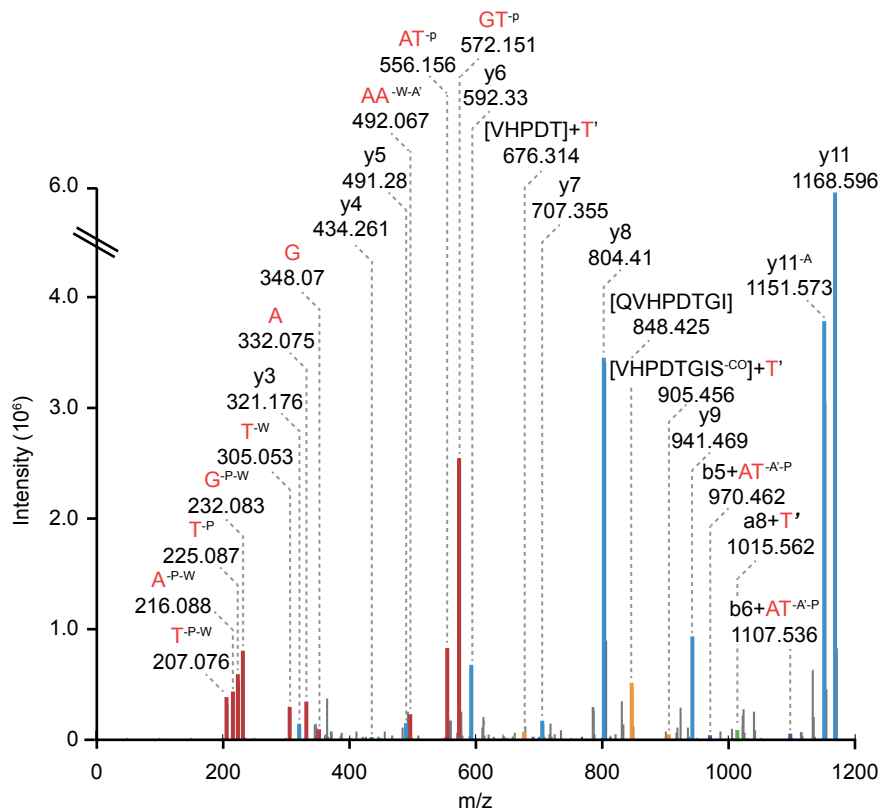

DCP #7  
<sup>45</sup>VLKQVHPDTGISSK<sup>58</sup> + [AGGT+HPO<sub>3</sub>]  
**Histone H2B-1K (O60814)**

| m(calculated) |           |            | $\Delta m$ [ppm] | experimental |        |
|---------------|-----------|------------|------------------|--------------|--------|
| peptide       | DNA       | cross-link |                  | m/z          | charge |
| 1507.8358     | 1373.1856 | 2881.0214  | 1.7              | 1441.5155    | 2      |

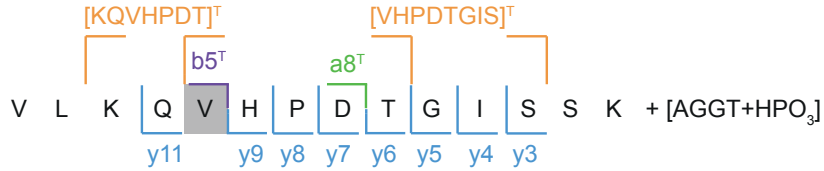

<sup>T</sup> observed as thymine crosslink

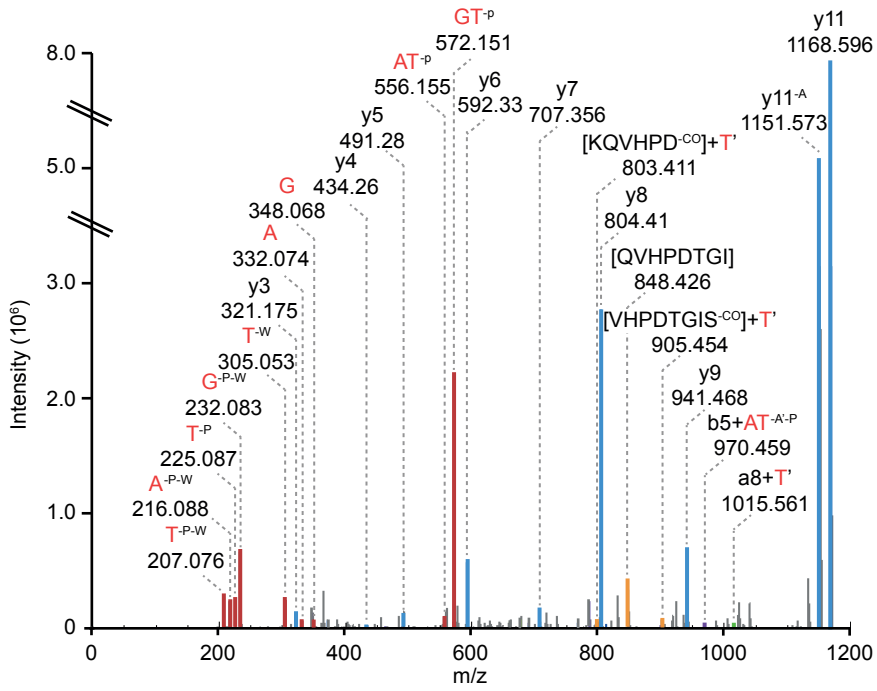



DCP #8

<sup>110</sup>HAVSEGTK<sup>Carb</sup>AVTK<sup>121</sup> + [GT]

**Histone H2B (O60814)**

| m(calculated) |          |            | $\Delta m$ [ppm] | experimental |        |
|---------------|----------|------------|------------------|--------------|--------|
| peptide       | DNA      | cross-link |                  | m/z          | charge |
| 1269.6677     | 651.1091 | 1920.7768  | 1.7              | 961.3941     | 2      |

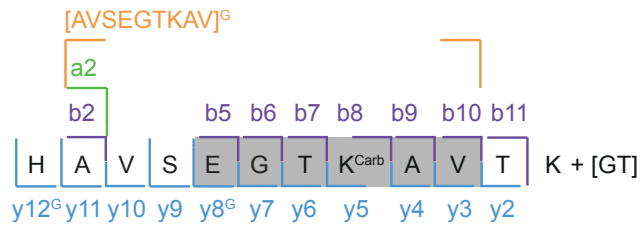

<sup>G</sup> observed as guanine crosslink

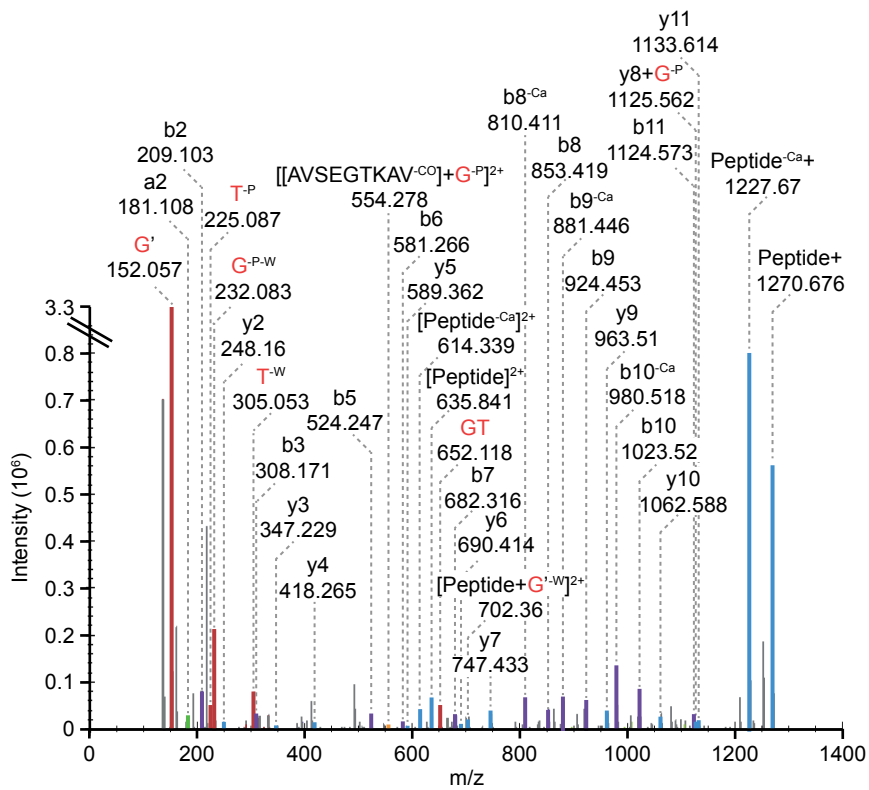

DCP #9  
<sup>79</sup>IIPRHLQLAIRNDEELNK<sup>96</sup> + [AT]  
**Histone H2A (P04908)**

| m(calculated) |          |            | $\Delta m$ [ppm] | experimental |        |
|---------------|----------|------------|------------------|--------------|--------|
| peptide       | DNA      | cross-link |                  | m/z          | charge |
| 2171.2175     | 635.1142 | 2806.3317  | 8.3              | 702.5960     | 4      |

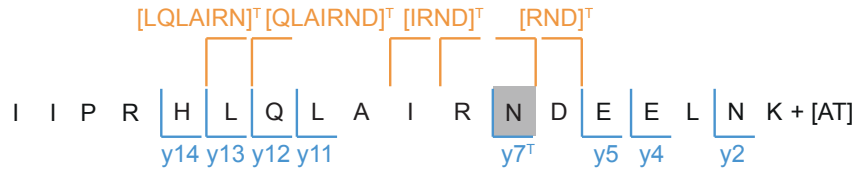

<sup>T</sup> observed as thymine crosslink

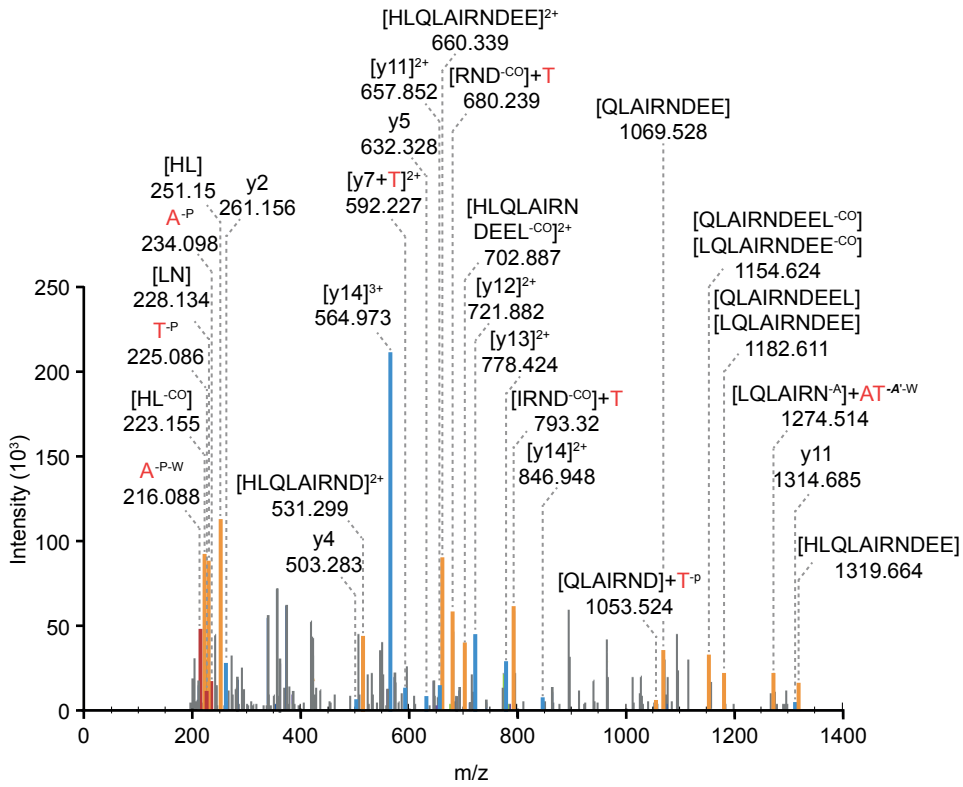

DCP #10  
 $^{81}\text{HLQLAIRNDEELNK}^{\text{Carb},96} + [\text{T-HPO}_3]$   
**Histone H2A (P04908)**

| m(calculated) |          |            | $\Delta m$ [ppm] | experimental |        |
|---------------|----------|------------|------------------|--------------|--------|
| peptide       | DNA      | cross-link |                  | m/z          | charge |
| 1734.9013     | 242.0903 | 1976.9916  | 10.0             | 660.0110     | 3      |

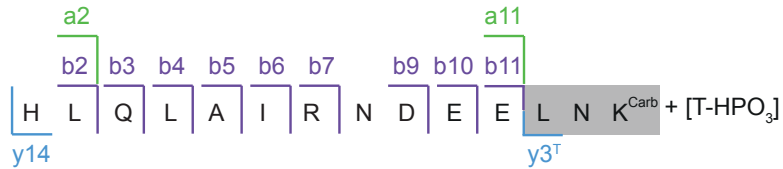

<sup>T</sup> observed as thymine crosslink

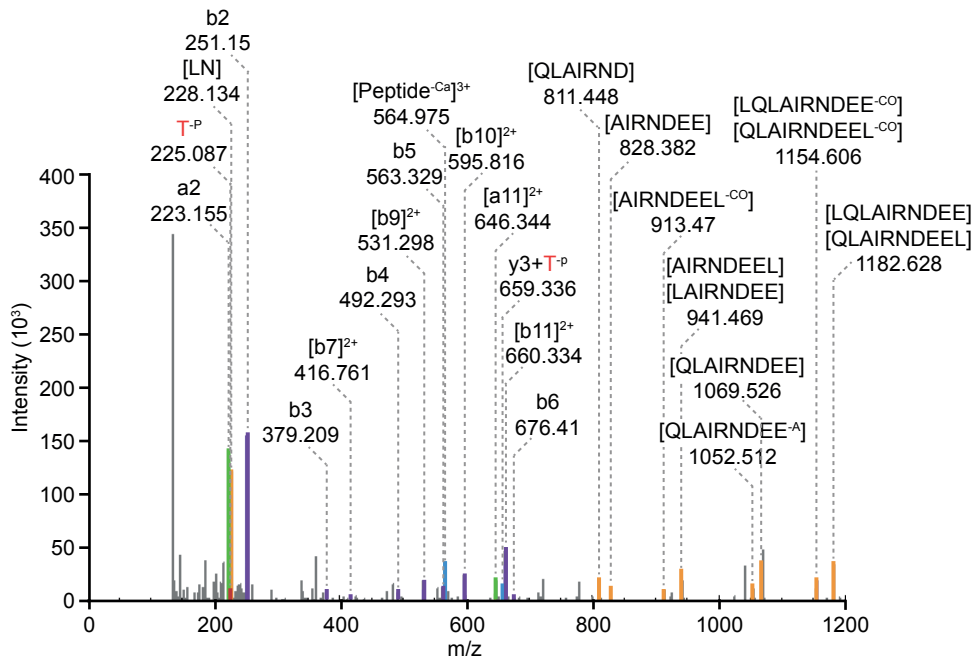

DCP #11  
 $^{81}\text{HLQLAIR}^{89} + [\text{AAT-HPO}_3]$   
**Histone H2A (P04908)**

| m(calculated) |          |            | $\Delta m$ [ppm] | experimental |        |
|---------------|----------|------------|------------------|--------------|--------|
| peptide       | DNA      | cross-link |                  | m/z          | charge |
| 849.5185      | 868.2055 | 1717.724   | 2.6              | 573.5804     | 3      |

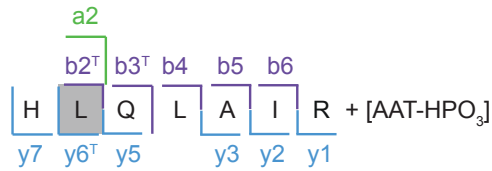

<sup>T</sup> observed as thymine crosslink

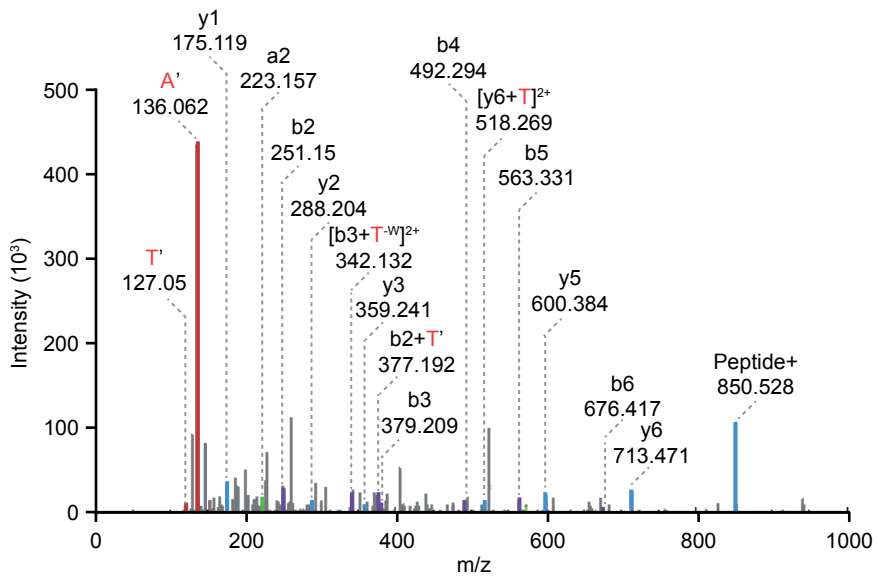

DCP #12  
<sup>90</sup>NDEELNK<sup>96</sup> + [AC]  
**Histone H2A (P04908)**

| m(calculated) |          | $\Delta m$ [ppm] | experimental |        |
|---------------|----------|------------------|--------------|--------|
| peptide       | DNA      |                  | m/z          | charge |
| 860.3876      | 620.1145 | 1.1              | 741.2575     | 2      |

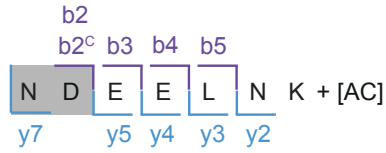

<sup>c</sup> observed as cytosine crosslink

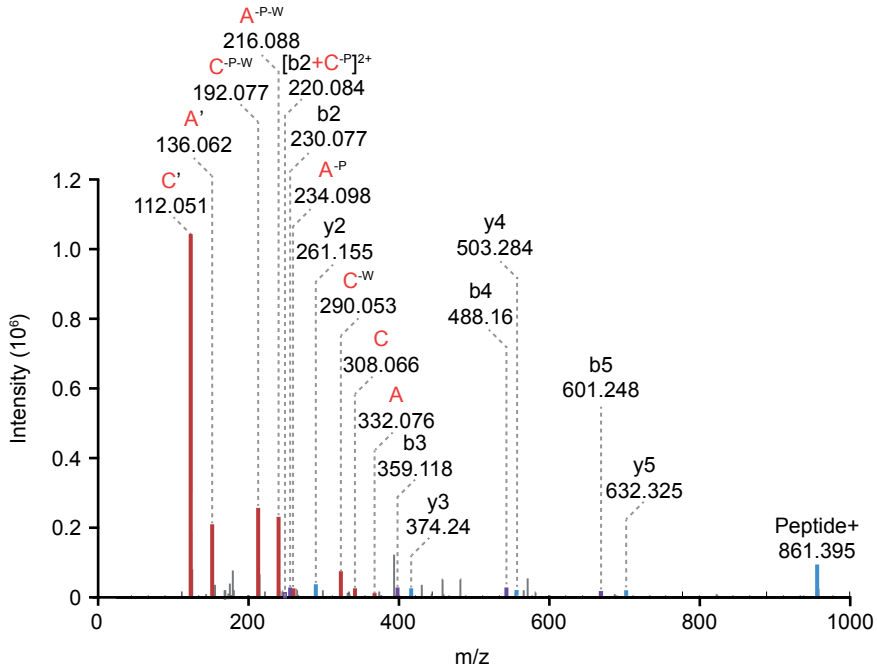

DCP #13  
<sup>83</sup>DIRPECR<sup>89</sup> + [CCT]  
**Nuclear Factor 1C (P21999)**

| peptide  | m(calculated) |            | $\Delta m$ [ppm] | experimental |        |
|----------|---------------|------------|------------------|--------------|--------|
|          | DNA           | cross-link |                  | m/z          | charge |
| 887.4283 | 900.1494      | 1787.5777  | 6.0              | 894.7907     | 2      |

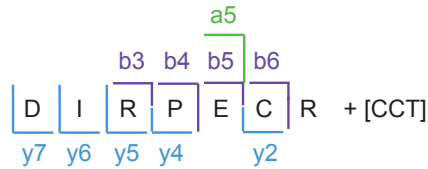

<sup>c</sup> observed as cytosine crosslink

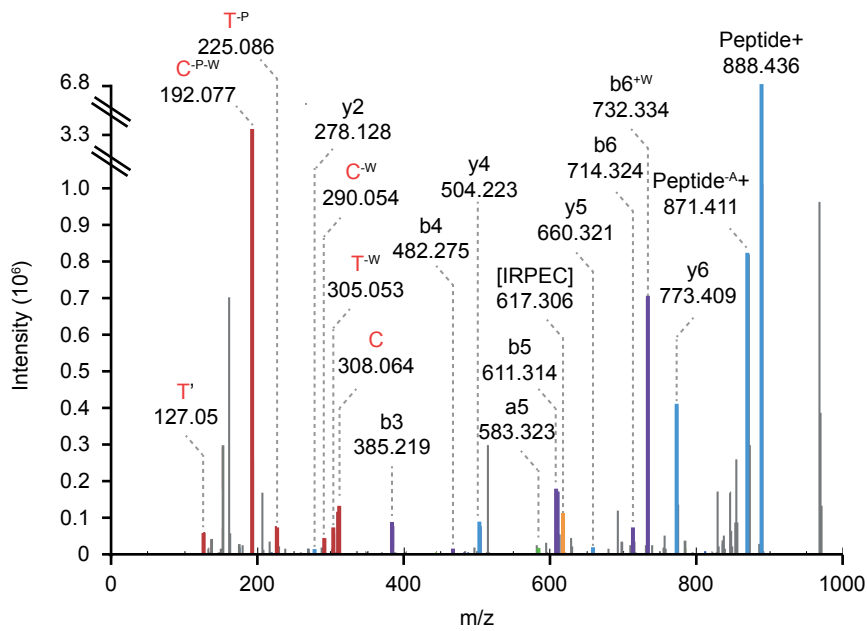

DCP #14  
<sup>101</sup>APGC<sup>Triox</sup>VLSNPDQK<sup>112</sup> + [C]  
**Nuclear Factor 1C (P21999)**

| m(calculated) |          |            | $\Delta m$ [ppm] | experimental |        |
|---------------|----------|------------|------------------|--------------|--------|
| peptide       | DNA      | cross-link |                  | m/z          | charge |
| 1275.5765     | 307.0569 | 1582.6335  | 6.4              | 792.3290     | 2      |

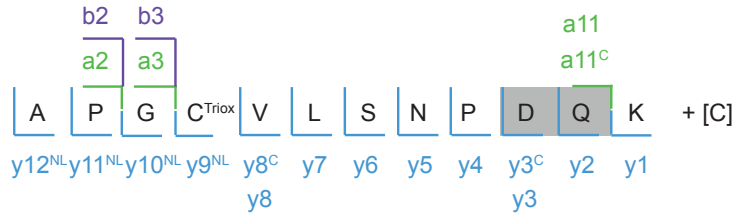

<sup>C</sup> observed as cytosine crosslink

<sup>NL</sup> observed after Neutral Loss of H<sub>2</sub>SO<sub>3</sub>(\*) or H<sub>2</sub>O<sub>2</sub>(HP)

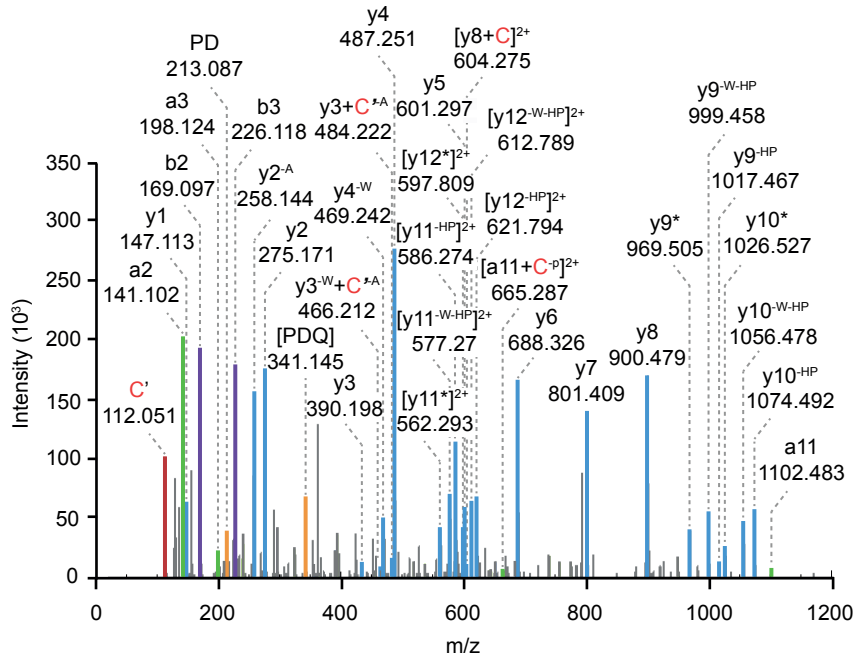

DCP #15  
<sup>117</sup>RIDCLR<sup>122</sup> + [TT]  
**Nuclear Factor 1C (P21999)**

| m(calculated) |          |            | $\Delta m$ [ppm] | experimental |        |
|---------------|----------|------------|------------------|--------------|--------|
| peptide       | DNA      | cross-link |                  | m/z          | charge |
| 774.417       | 626.1026 | 1400.5197  | 8.2              | 701.2614     | 2      |

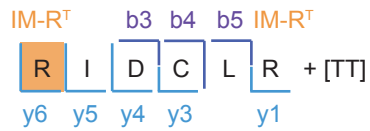

IM-R<sup>T</sup>: observed as thymine crosslink  
on arginine immonium ion

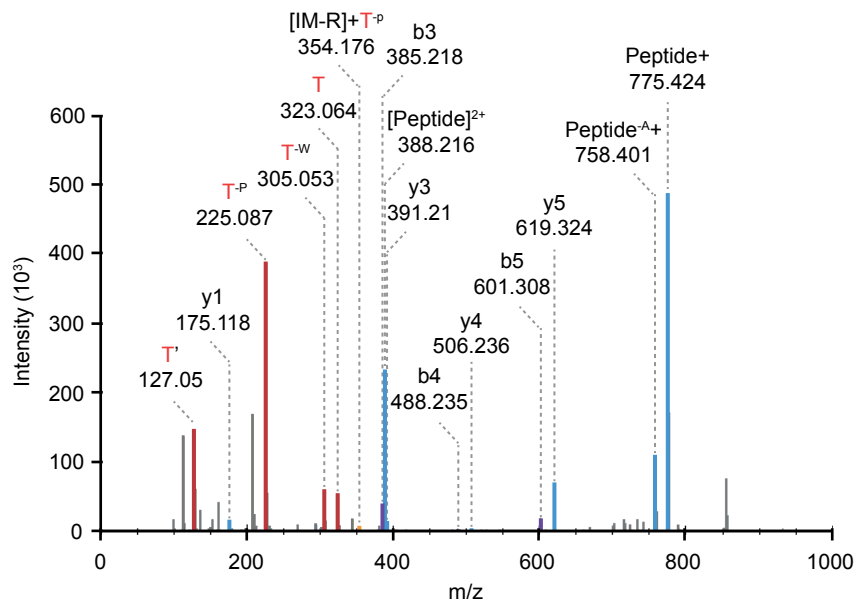



DCP #16  
<sup>140</sup>GIPLESTDGER<sup>150</sup> + [AC-H<sub>3</sub>PO<sub>4</sub>]  
**Nuclear Factor 1C (P21999)**

| m(calculated) |          |            | $\Delta m$ [ppm] | experimental |        |
|---------------|----------|------------|------------------|--------------|--------|
| peptide       | DNA      | cross-link |                  | m/z          | charge |
| 1172.5673     | 522.1376 | 1694.705   | 6.3              | 848.3651     | 2      |

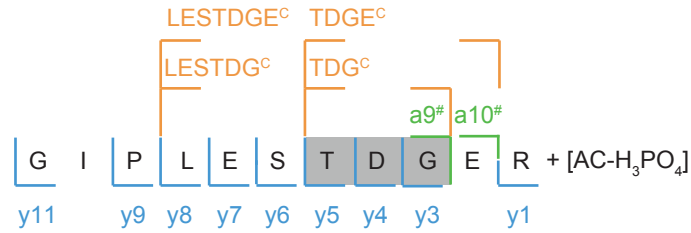

<sup>c</sup> observed as cytosine crosslink  
<sup>#</sup> neutral loss of 98.005

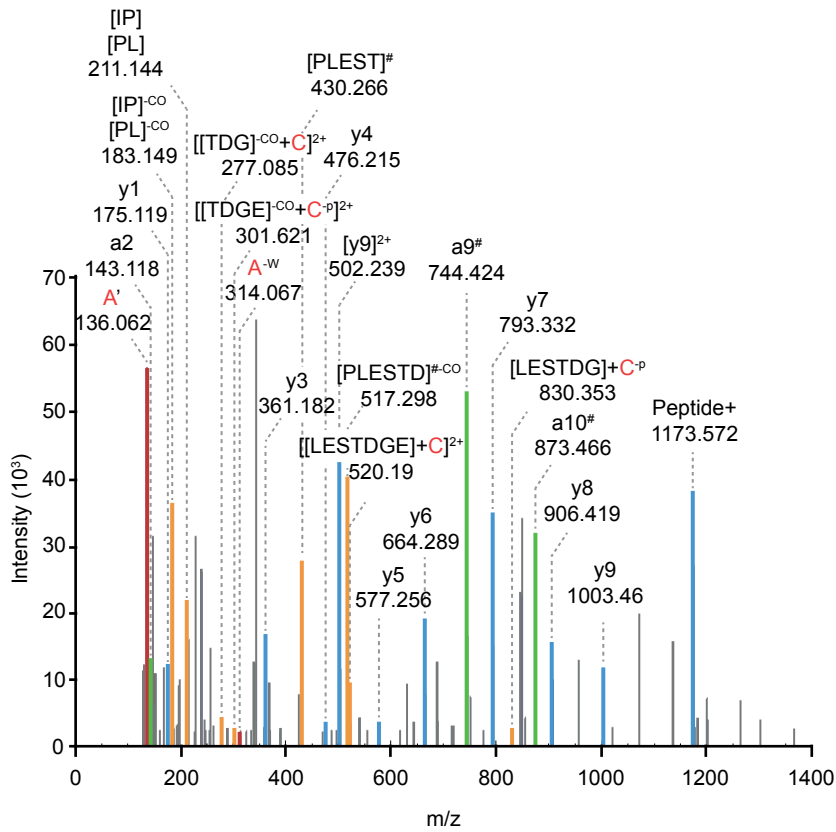



DCP #18  
<sup>209</sup>TTALIFSSGKM<sup>Ox</sup>VC<sup>Triox</sup>TGAK<sup>225</sup> + [AC-HPO<sub>3</sub>]  
**TATA-box-binding protein (P20226)**

| m(calculated) |          |            | $\Delta m$ [ppm] | experimental |        |
|---------------|----------|------------|------------------|--------------|--------|
| peptide       | DNA      | cross-link |                  | m/z          | charge |
| 1777.859      | 540.1482 | 2318.0072  | 8.5              | 773.6829     | 3      |

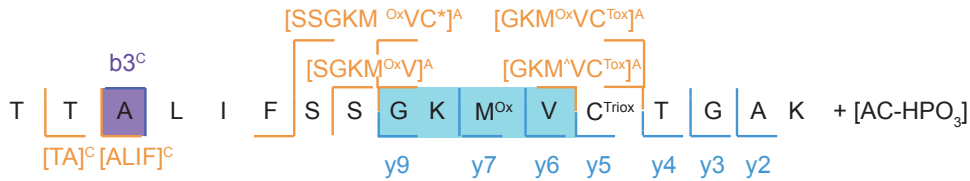

- <sup>c</sup> observed as cytosine crosslink
- <sup>A</sup> observed as adenine crosslink
- \* neutral loss of H<sub>2</sub>SO<sub>3</sub> on trioxidized cysteine
- <sup>A</sup> neutral loss of CH<sub>4</sub>SO on oxidized methionine

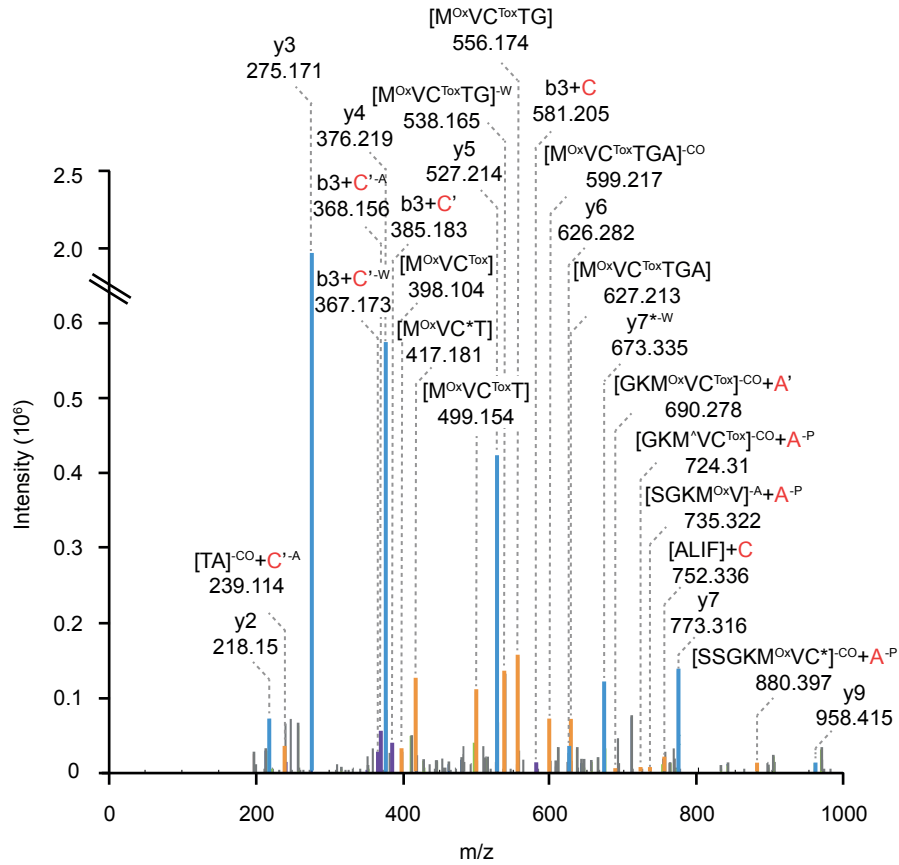

DCP #19

<sup>255</sup>IQNM<sup>Ox</sup>VGSC<sup>Triox</sup>DVK<sup>265</sup> + [TT-HPO<sub>3</sub>]

**TATA-box-binding protein (P20226)\***

| m(calculated) |          |            | Δm [ppm] | experimental |        |
|---------------|----------|------------|----------|--------------|--------|
| peptide       | DNA      | cross-link |          | m/z          | charge |
| 1256.5377     | 546.1363 | 1802.6866  | 3.4      | 902.3474     | 2      |

<sup>†</sup>RnpXI identified crosslink as AA-H<sub>2</sub>O-HPO<sub>3</sub>, however, marker ions and shifted ions clearly point towards TT-HPO<sub>3</sub>

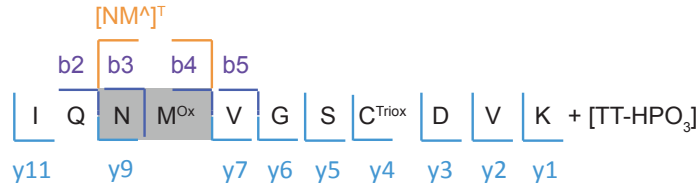

<sup>†</sup> observed as thymine crosslink

<sup>^</sup> neutral loss of CH<sub>4</sub>SO

\* neutral loss of H<sub>2</sub>SO<sub>3</sub> on trioxidized cysteine

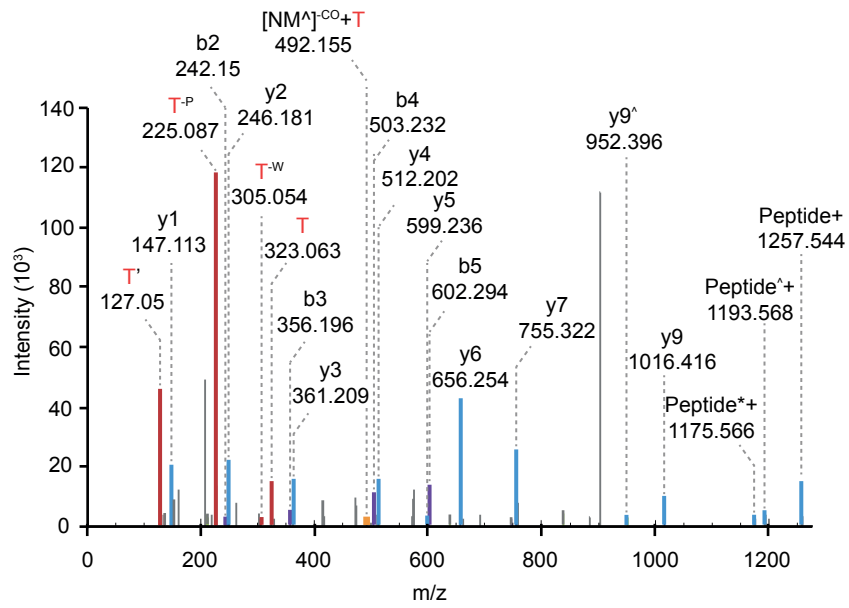

DCP #20  
<sup>178</sup>LDLKTIALR<sup>186</sup> + [C-HPO<sub>3</sub>]  
**TATA-box-binding protein (P20226)**

| m(calculated) |          |            | $\Delta m$ [ppm] | experimental |        |
|---------------|----------|------------|------------------|--------------|--------|
| peptide       | DNA      | cross-link |                  | m/z          | charge |
| 1041.6546     | 227.0906 | 1268.7452  | 3.4              | 635.3821     | 2      |

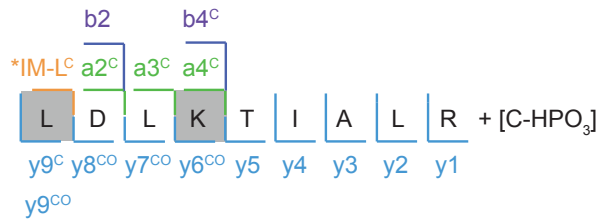

<sup>c</sup> observed as cytosine crosslink

<sup>-/+CO</sup> observed with NL/adduct of CO (+27.995)

\* a/b ions allow unambiguous localization of this leucine immonium ion

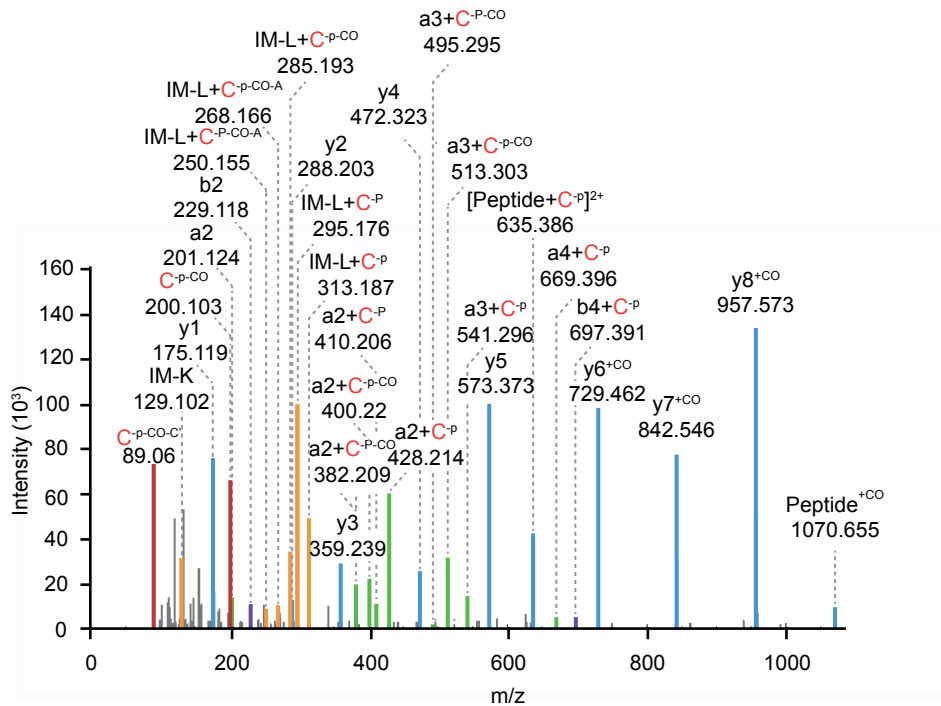

DCP #21

<sup>584</sup>HLKKAK<sup>589</sup> + [C-H<sub>2</sub>O]

**Prospero homeobox protein 1 (P48437)**

<sup>440</sup>HLKKAK<sup>445</sup> + [C-H<sub>2</sub>O]

**Prospero homeobox protein 2 (Q8BII1)**

| m(calculated) |          |            | $\Delta m$ [ppm] | experimental |        |
|---------------|----------|------------|------------------|--------------|--------|
| peptide       | DNA      | cross-link |                  | m/z          | charge |
| 723.4755      | 289.0464 | 1012.5219  | 3.6              | 507.2664     | 2      |

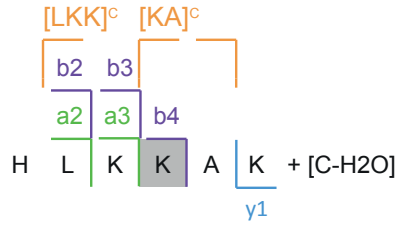

<sup>c</sup> observed as cytosine crosslink

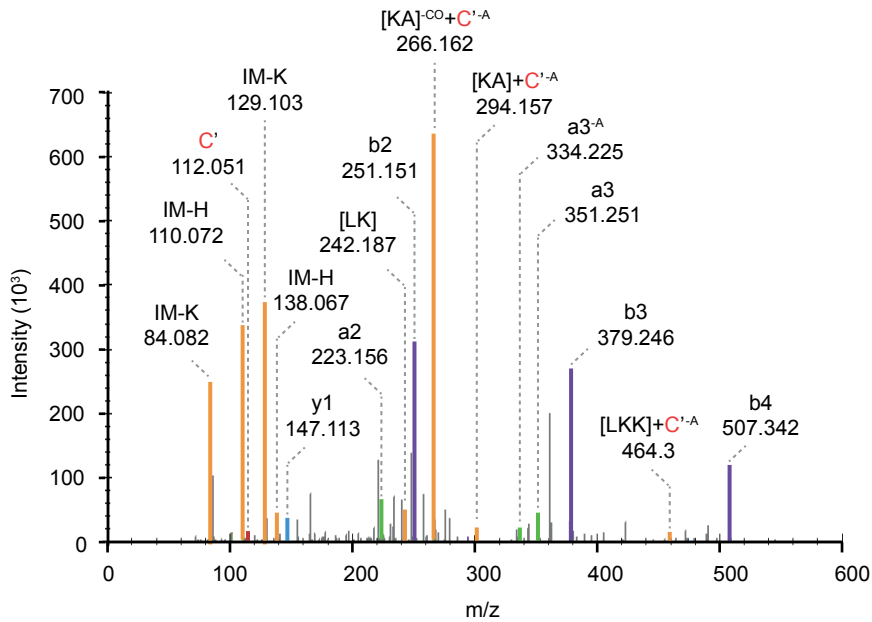

DCP #22

$^{18}\text{KPLLEK}^{23} + [\text{TT}]$

**Transcription factor Oct1(Pou2f1) (P25425)\*<sup>(1,2)</sup>**

| m(calculated) |          |            | $\Delta m$ [ppm] | experimental |        |
|---------------|----------|------------|------------------|--------------|--------|
| peptide       | DNA      | cross-link |                  | m/z          | charge |
| 726.464       | 626.1026 | 1352.5666  | 10.7             | 451.8677     | 3      |

<sup>1</sup> Proteins Pou2f3, Pou2f2, Hes2 and Mad2l2 not shown

<sup>2</sup> RnpXI identified crosslink as AA-H<sub>2</sub>O, however, marker ion and shifted ions clearly point towards TT

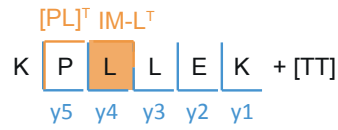

<sup>†</sup> observed as thymine crosslink

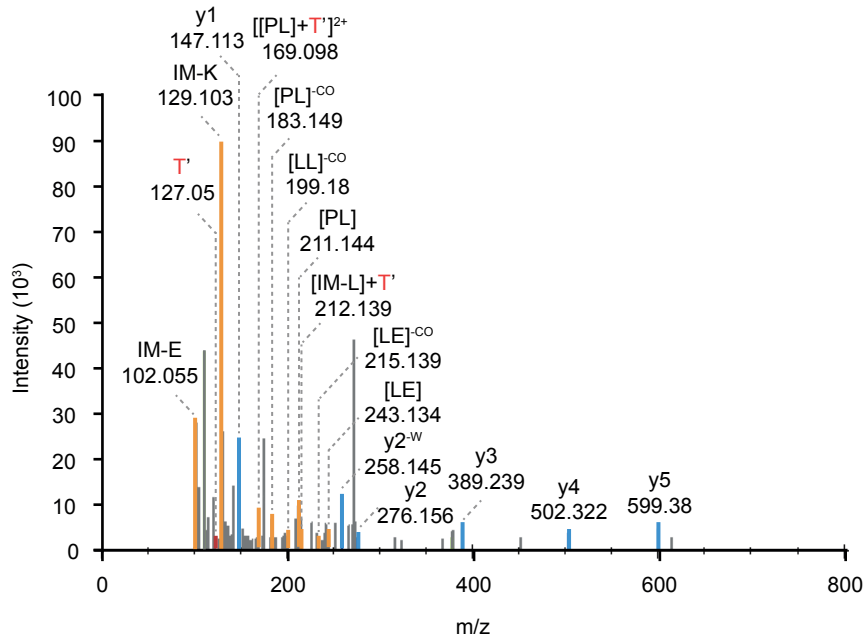

DCP #23

<sup>1325</sup>LQEHVEPVRVK<sup>1335</sup> + [G]

Zinc finger protein 541 (Q0GGX2)

| m(calculated) |          |            | $\Delta m$ [ppm] | experimental |        |
|---------------|----------|------------|------------------|--------------|--------|
| peptide       | DNA      | cross-link |                  | m/z          | charge |
| 1332.7514     | 347.0631 | 1679.8145  | 2.2              | 560.9467     | 3      |

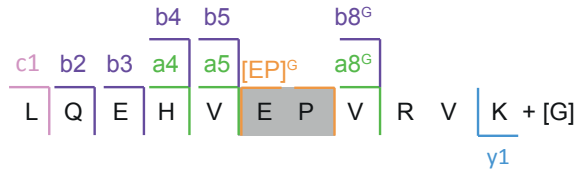

<sup>G</sup> observed as guanine crosslink

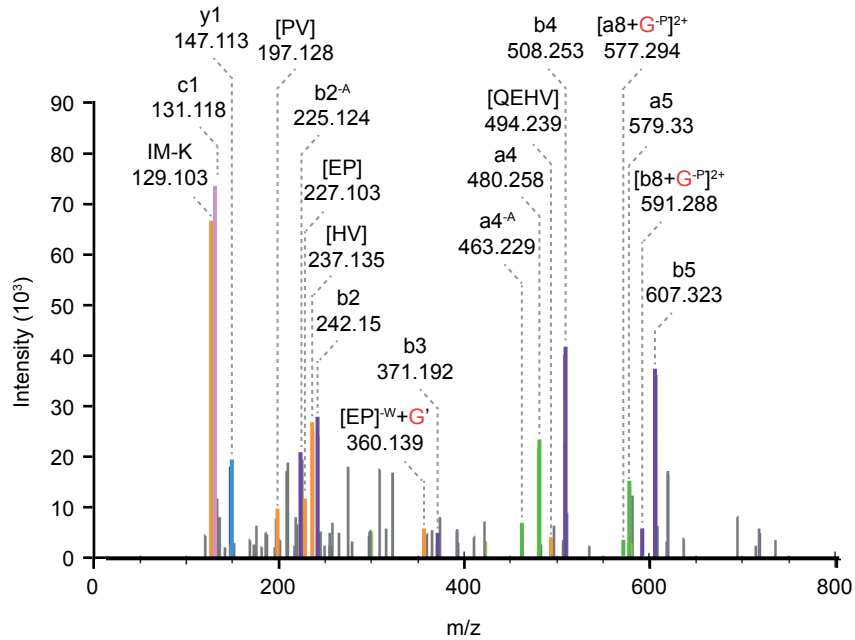



DCP #24

<sup>863</sup>ANEKYGR<sup>869</sup> + [T-HPO<sub>3</sub>]

Probable global transcription activator SNF2L1 (Q6PGB8)

| peptide  | m(calculated) |            | $\Delta m$ [ppm] | experimental |        |
|----------|---------------|------------|------------------|--------------|--------|
|          | DNA           | cross-link |                  | m/z          | charge |
| 836.4141 | 242.0903      | 1078.5043  | 0.9              | 360.5090     | 3      |

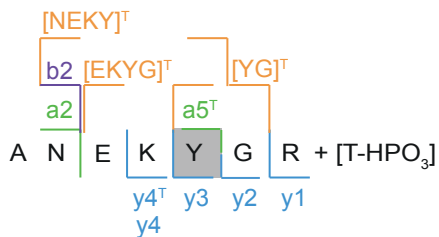

<sup>T</sup> observed as thymine crosslink

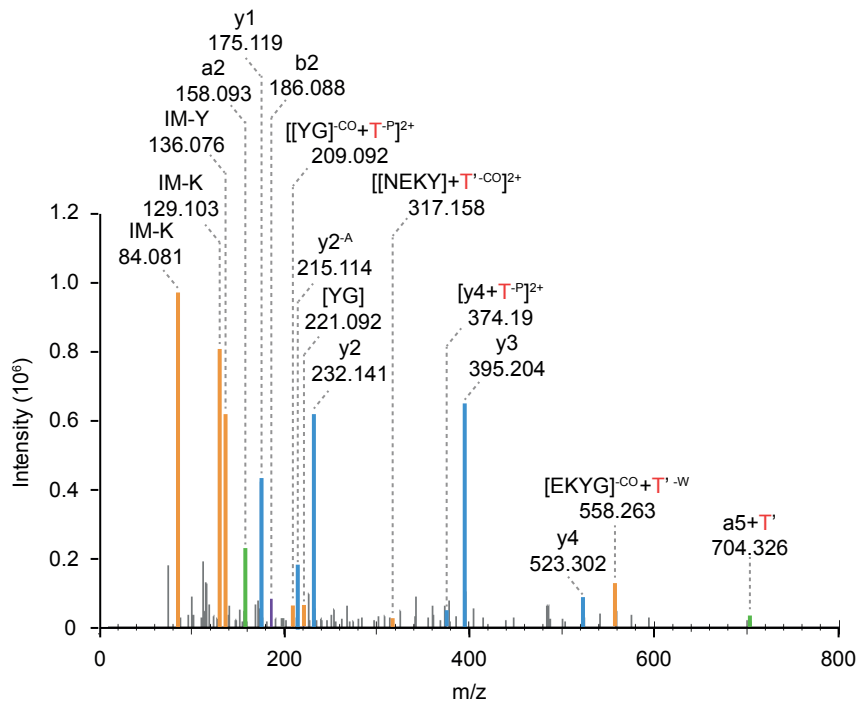

DCP #25

<sup>282</sup>AFGSSSTLIK<sup>291</sup> + [G-HPO<sub>3</sub>]

Zinc finger protein 354C (Q571J5)

| m(calculated) |          |            | $\Delta m$ [ppm] | experimental |        |
|---------------|----------|------------|------------------|--------------|--------|
| peptide       | DNA      | cross-link |                  | m/z          | charge |
| 1009.5444     | 267.0968 | 1276.6412  | 3.7              | 639.3302     | 2      |

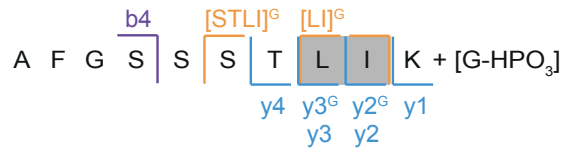

<sup>G</sup> observed as guanine crosslink

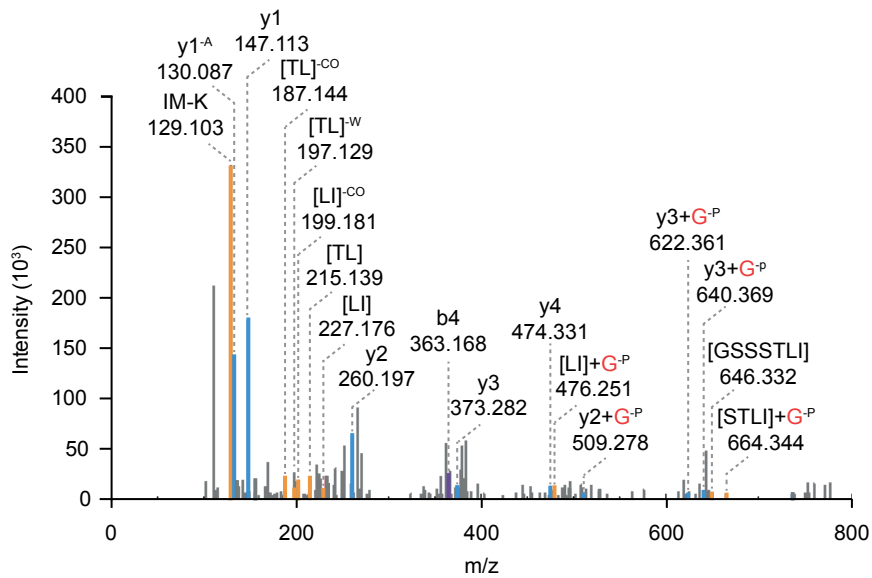

DCP #26  
<sup>444</sup>KDSVVAHKAK<sup>453</sup> + [AT+HPO<sub>3</sub>]  
**Zinc finger protein 91 (Q62511)**

| m(calculated) |          |            | $\Delta m$ [ppm] | experimental |        |
|---------------|----------|------------|------------------|--------------|--------|
| peptide       | DNA      | cross-link |                  | m/z          | charge |
| 1081.6244     | 715.0805 | 1796.7049  | 7.8              | 599.9136     | 3      |

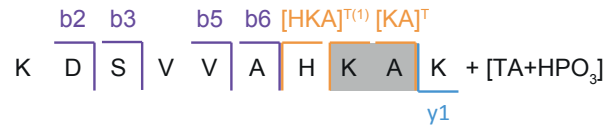

T observed as thymine crosslink  
<sup>(1)</sup> Could also be [AHK]<sup>T</sup>

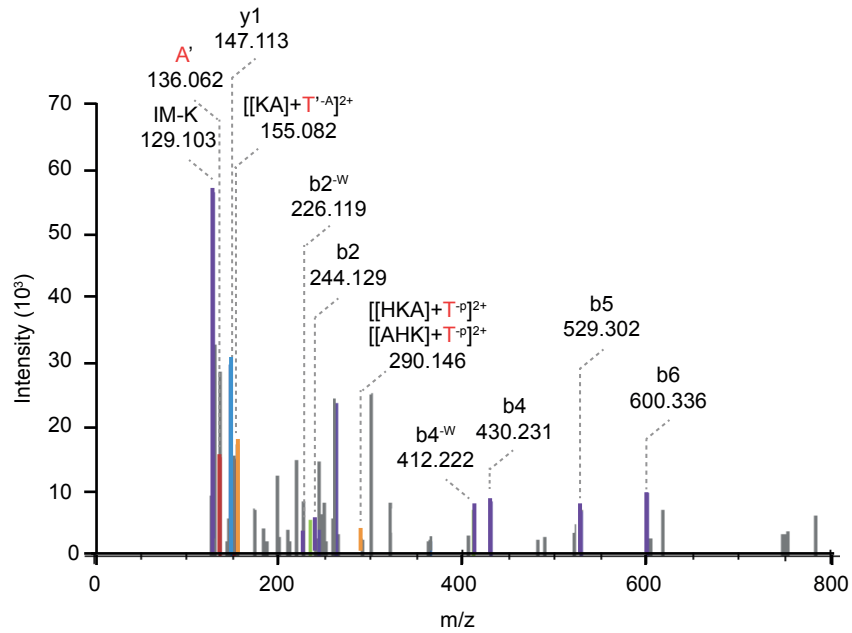

Supplement: MOESM4 [file 41467_2020_16837_MOESM4_ESM.pdf]
